# Supplementary material for: Hydrolytic activity of histidine-containing octapeptides in water identified by quantitative screening of a combinatorial library
Source: Royal Society of Chemistry journal article supplement (doi:10.1039/b904415a), 2009-01-01
Supplement: b904415a.pdf [file b904415a.pdf]

# Hydrolytic activity of histidine-containing octapeptides in water identified by quantitative screening of a combinatorial library

Carsten Schmuck,<sup>\*a</sup> and Jürgen Dudaczek<sup>a</sup>

Supporting Information

HPLC chromatograms of the peptides used in the solution studies

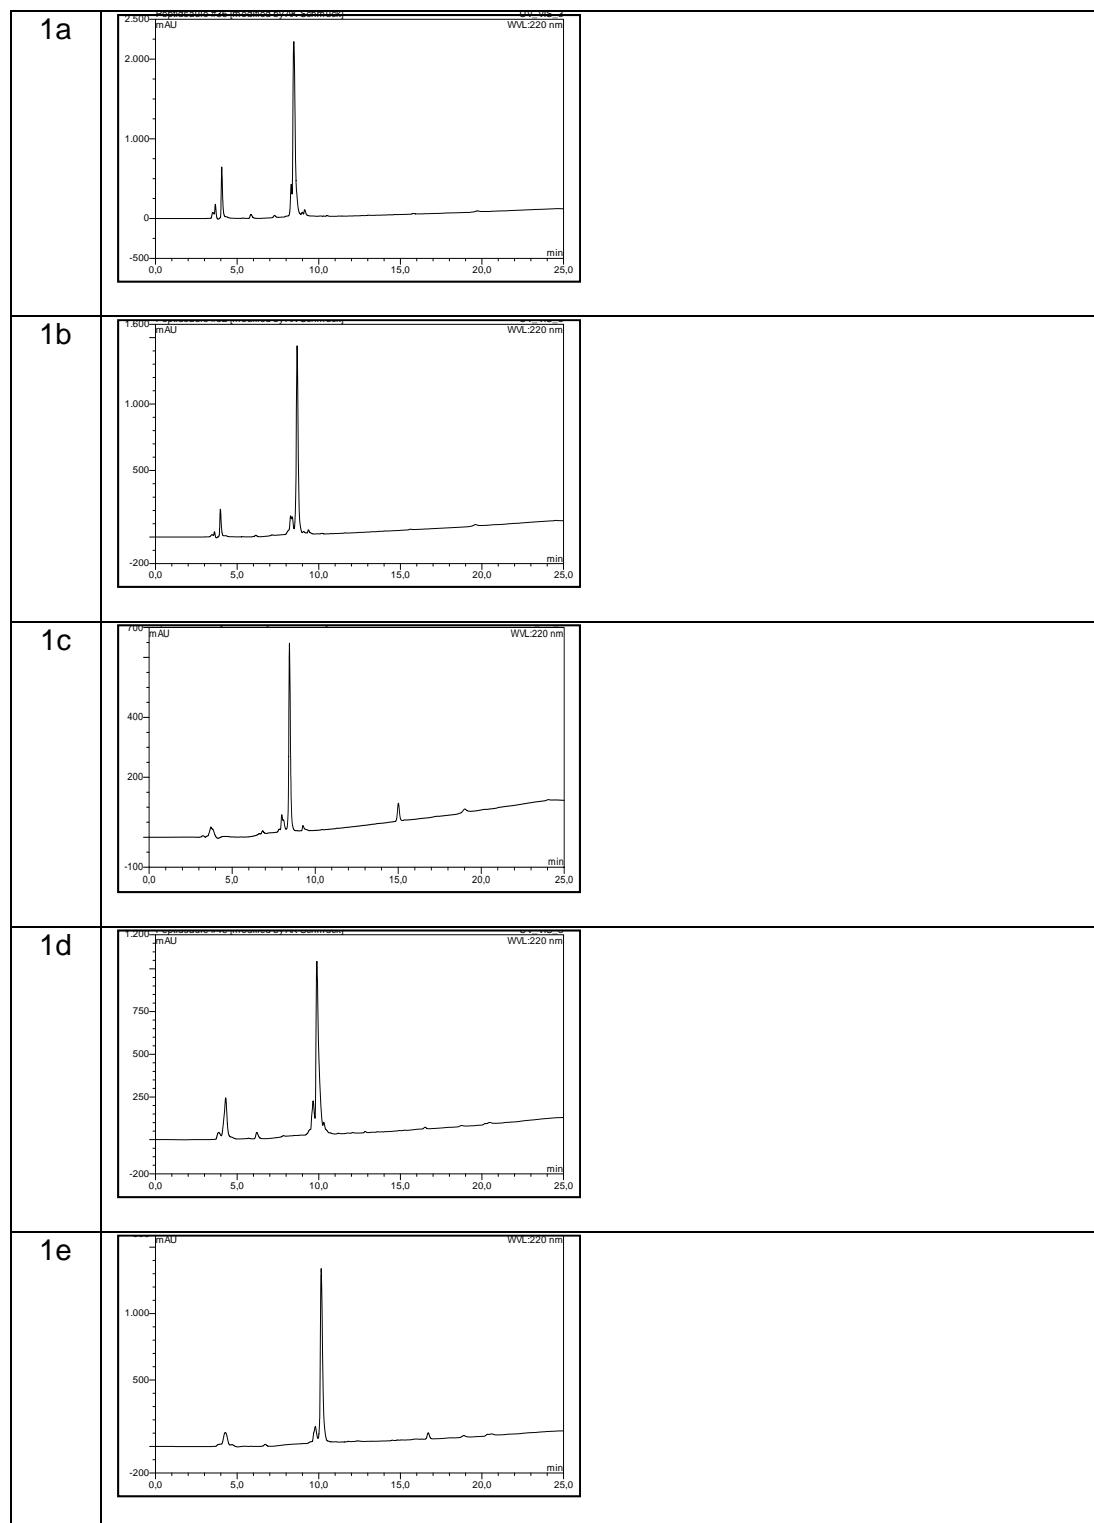

|                                                                                                                                                                                                                                                                                    |                                                                                     |
|------------------------------------------------------------------------------------------------------------------------------------------------------------------------------------------------------------------------------------------------------------------------------------|-------------------------------------------------------------------------------------|
| 1f                                                                                                                                                                                                                                                                                 | 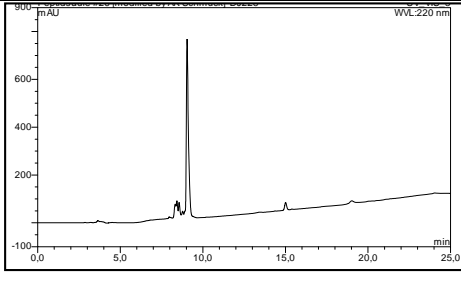   |
| 1g                                                                                                                                                                                                                                                                                 |    |
| 1h                                                                                                                                                                                                                                                                                 |   |
| 1i                                                                                                                                                                                                                                                                                 |  |
| 1j                                                                                                                                                                                                                                                                                 |  |
| <p>acetonitrile + 0.05% TFA / water + 0.05% TFA</p> <p>gradient: acetonitrile + 0.05% TFA 10% in 20 min to 100%</p> <p>detection: 220 nm</p> <p>samples: 2 mg/1000 µl (100 µl water + 0.05% TFA : 900 µl acetonitrile + 0.05% TFA)</p> <p>column: YMC-Pack Octyl OC20S031504QT</p> |                                                                                     |

|  |                                              |
|--|----------------------------------------------|
|  | 150 x 4.0 mm i.d., S-3 $\mu\text{m}$ , 20 nm |
|--|----------------------------------------------|
